# Supplementary material
Source: PubMed Central journal article supplement (PMC6883173)
Supplement: NIHMS1541019-supplement-2.pdf [file NIHMS1541019-supplement-2.pdf]

1 **Supplementary information**

2

3 **Supplementary Table 1. X-ray data collection, phase and structure refinement**  
 4 **statistics.**

5

|                                                                      | <b>Tas1<sub>tox</sub>-Tis1 complex</b><br>(6OX6) | <b>PurF<sup>EC</sup>-ppApp complex</b><br>(6OTT) |
|----------------------------------------------------------------------|--------------------------------------------------|--------------------------------------------------|
| <b>Data Collection</b>                                               |                                                  |                                                  |
| Space group                                                          | P4 <sub>3</sub> 2 <sub>1</sub> 2                 | C222 <sub>1</sub>                                |
| Cell dimensions                                                      |                                                  |                                                  |
| <i>a, b, c</i> (Å)                                                   | 66.4, 66.4, 147.9                                | 115.2, 156.8, 107.5                              |
| $\alpha, \beta, \gamma$ (°)                                          | 90.0, 90.0, 90.0                                 | 90.0, 90.0, 90.0                                 |
| Wavelength (Å)                                                       | 0.979                                            | 0.979                                            |
| Resolution (Å)                                                       | 50.00 – 2.17                                     | 47.6-2.55                                        |
| <i>R</i> <sub>merge</sub> <sup>a</sup>                               | 0.083 (0.243)*                                   | 0.106 (1.27)                                     |
| <i>I</i> / $\sigma$ ( <i>I</i> )                                     | 33.4 (6.2)                                       | 9.0 (1.0)                                        |
| Completeness (%)                                                     | 98.0 (96.4)                                      | 99.8 (100)                                       |
| Redundancy                                                           | 9.2 (4.1)                                        | 5.8 (6.2)                                        |
| <b>Refinement</b>                                                    |                                                  |                                                  |
| Resolution (Å)                                                       | 49.6 – 2.17                                      | 47.6 – 2.55                                      |
| No. reflections                                                      |                                                  |                                                  |
| Total                                                                | 18200                                            | 186253                                           |
| Unique                                                               | 17596                                            | 32044                                            |
| Free (%)                                                             | 5.00                                             | 6.23                                             |
| <i>R</i> <sub>work</sub> / <i>R</i> <sub>free</sub> (%) <sup>b</sup> | 18.5/23.1                                        | 22.3/26.1                                        |
| No. atoms                                                            |                                                  |                                                  |
| Protein                                                              | 2119                                             | 15508                                            |
| Ligand/ion                                                           | 28                                               | 28                                               |
| Water                                                                | 316                                              | 0                                                |
| <i>B</i> -factors (Å <sup>2</sup> )                                  |                                                  |                                                  |
| Protein                                                              | 40.8                                             | 74.6                                             |
| Ligand/ion                                                           | 72.0                                             | 61                                               |
| Water                                                                | 53.7                                             | -                                                |
| r.m.s deviations                                                     |                                                  |                                                  |
| Bond lengths (Å)                                                     | 0.006                                            | 0.02                                             |
| Bond angles (°)                                                      | 0.993                                            | 0.547                                            |

6 Single crystals were used to collect data for each structure. \*values in brackets value refer  
 7 to highest resolution shells.

8 <sup>a</sup>*R*<sub>merge</sub> =  $\sum_{hkl} \sum_j |I_{hkl,j} - \langle I_{hkl} \rangle| / \sum_{hkl} \sum_j I_{hkl,j}$ , where *I*<sub>hkl,j</sub> and  $\langle I_{hkl} \rangle$  are the *j*th and mean measurement  
 9 of the intensity of reflection *j*.

10 <sup>b</sup>*R* =  $\sum |F_p^{obs} - F_p^{calc}| / \sum F_p^{obs}$ , where *F*<sub>p</sub><sup>obs</sup> and *F*<sub>p</sub><sup>calc</sup> are the observed and calculated structure  
 11 factor amplitudes, respectively.

12

1 **Supplementary Table 2. <sup>1</sup>H and <sup>31</sup>P NMR assignments for pApp.** The chemical shifts  
 2 (in ppm) for pApp. α-proton of the pyrophosphate group was identified from its ddd pattern  
 3 with a characteristic J-coupling constant with the proximal <sup>31</sup>P nuclei at 8.5Hz (0.014 ppm  
 4 for protons or 0.036ppm for <sup>31</sup>P). This proton was assigned to the 3' location by comparing  
 5 proton chemical shifts to those observed for adenosine-5'-phosphate (AMP, BMRB  
 6 database ID: BMSE000837) and a chemically synthesized adenosine-3', 5'-bisdiphosphate  
 7 (ppApp) under the same condition<sup>1</sup>. Note that compared to a free hydroxyl group,  
 8 pyrophosphorylation increases the chemical shift of the α-proton by 0.3-0.4 ppm.

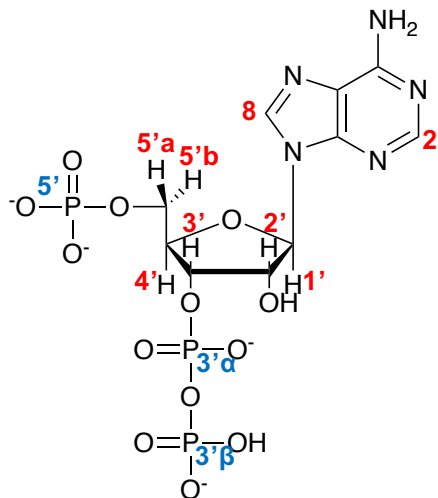

|       | Position                   | Base ( <sup>1</sup> H) |        | Ribose ( <sup>1</sup> H) |         |          |        |           | Phosphate ( <sup>31</sup> P) |         |        |
|-------|----------------------------|------------------------|--------|--------------------------|---------|----------|--------|-----------|------------------------------|---------|--------|
|       |                            | 2                      | 8      | 1'                       | 2'      | 3'       | 4'     | 5'a / 5'b | 5'α                          | 3'α     | 3'β    |
| pApp  | Chemical Shift (ppm)       | 8.15                   | 8.59   | 6.16                     | 4.88    | 4.93     | 4.55   | 4.02      | 3.75                         | -10.00  | -5.06  |
|       | Integration (multiplicity) | 1H (s)                 | 1H (s) | 1H (d)                   | 1H (dd) | 1H (ddd) | 1H (m) | 2H (m)    | 1P (s)                       | 1P (dd) | 1P (d) |
| ppApp | Chemical Shift (ppm)       | 8.19                   | 8.48   | 6.12                     | 4.79    | 4.90     | 4.54   | 4.16      | -                            | -       | -      |
|       | Integration (multiplicity) | 1H (s)                 | 1H (s) | 1H (d)                   | 1H (dd) | 1H (ddd) | 1H (m) | 2H (m)    | -                            | -       | -      |
| AMP   | Chemical Shift (ppm)       | 8.13                   | 8.48   | 6.09                     | 4.75    | 4.51     | 4.38   | 4.10      | -                            | -       | -      |
|       | Integration (multiplicity) | 1H (s)                 | 1H (s) | 1H (d)                   | 1H (dd) | 1H (dd)  | 1H (m) | 2H (m)    | -                            | -       | -      |

\* “-” indicates assignment not clear or data not available.

1 **Supplementary Table 3. Absolute nucleotide quantification of *P. aeruginosa* cells**  
 2 **undergoing Tas1-mediated intoxication.**  
 3

| Metabolite | Concentration in Tis1 depleted cells (nmol/OD) |       |       |       | Concentration in Tis1 expressing cells (nmol/OD) |       |       |
|------------|------------------------------------------------|-------|-------|-------|--------------------------------------------------|-------|-------|
|            | time (min)                                     |       |       |       |                                                  |       |       |
|            | 0                                              | 30    | 60    | 120   | 0                                                | 30    | 60    |
| AMP        |                                                |       |       |       |                                                  |       |       |
| R1         | 0.179                                          | 0.193 | 0.238 | 0.315 | 0.253                                            | 0.323 | 0.317 |
| R2         | 0.151                                          | 0.172 | 0.207 | 0.236 | 0.369                                            | 0.326 | 0.342 |
| R3         | 0.218                                          | 0.213 | 0.170 | 0.284 | 0.365                                            | 0.350 | 0.490 |
| ADP        |                                                |       |       |       |                                                  |       |       |
| R1         | 0.547                                          | 0.441 | 0.387 | 0.330 | 0.631                                            | 0.747 | 0.652 |
| R2         | 0.507                                          | 0.407 | 0.379 | 0.232 | 0.700                                            | 0.634 | 0.644 |
| R3         | 0.731                                          | 0.537 | 0.340 | 0.346 | 0.707                                            | 0.681 | 0.667 |
| ATP        |                                                |       |       |       |                                                  |       |       |
| R1         | 2.716                                          | 2.091 | 1.462 | 0.939 | 2.648                                            | 2.484 | 2.096 |
| R2         | 3.212                                          | 2.054 | 1.299 | 0.614 | 2.042                                            | 2.281 | 2.000 |
| R3         | 3.191                                          | 1.992 | 1.264 | 0.916 | 2.495                                            | 2.221 | 1.641 |
| ppApp      |                                                |       |       |       |                                                  |       |       |
| R1         | 0.128                                          | 1.020 | 1.186 | 1.154 | n.d.                                             | n.d.  | n.d.  |
| R2         | 0.126                                          | 1.095 | 1.073 | 0.773 | n.d.                                             | n.d.  | n.d.  |
| R3         | 0.154                                          | 1.223 | 1.105 | 1.226 | n.d.                                             | n.d.  | n.d.  |
| pppApp     |                                                |       |       |       |                                                  |       |       |
| R1         | 0.355                                          | 3.588 | 3.964 | 3.768 | n.d.                                             | n.d.  | n.d.  |
| R2         | 0.576                                          | 3.986 | 3.763 | 2.609 | n.d.                                             | n.d.  | n.d.  |
| R3         | 0.588                                          | 4.628 | 3.184 | 3.909 | n.d.                                             | n.d.  | n.d.  |
| GMP        |                                                |       |       |       |                                                  |       |       |
| R1         | 0.077                                          | 0.021 | 0.032 | 0.034 | 0.072                                            | 0.093 | 0.080 |
| R2         | 0.048                                          | 0.019 | 0.022 | 0.003 | 0.090                                            | 0.094 | 0.068 |
| R3         | 0.050                                          | 0.074 | 0.031 | 0.048 | 0.098                                            | 0.076 | 0.091 |
| GDP        |                                                |       |       |       |                                                  |       |       |
| R1         | 0.132                                          | 0.113 | 0.096 | 0.102 | 0.197                                            | 0.233 | 0.184 |
| R2         | 0.141                                          | 0.115 | 0.085 | 0.065 | 0.203                                            | 0.219 | 0.173 |
| R3         | 0.171                                          | 0.141 | 0.082 | 0.093 | 0.210                                            | 0.226 | 0.163 |
| GTP        |                                                |       |       |       |                                                  |       |       |
| R1         | 0.874                                          | 0.748 | 0.490 | 0.340 | 1.095                                            | 0.972 | 0.749 |
| R2         | 1.060                                          | 0.742 | 0.410 | 0.249 | 0.785                                            | 0.907 | 0.652 |
| R3         | 0.928                                          | 0.703 | 0.433 | 0.335 | 0.916                                            | 0.799 | 0.526 |
| UTP        |                                                |       |       |       |                                                  |       |       |
| R1         | 1.548                                          | 1.140 | 0.719 | 0.393 | 2.111                                            | 2.235 | 1.780 |
| R2         | 1.780                                          | 1.192 | 0.590 | 0.284 | 1.745                                            | 2.046 | 1.779 |
| R3         | 1.498                                          | 1.134 | 0.642 | 0.411 | 1.870                                            | 1.774 | 1.259 |
| dATP       |                                                |       |       |       |                                                  |       |       |
| R1         | 0.147                                          | 0.126 | 0.088 | 0.063 | 0.114                                            | 0.108 | 0.082 |
| R2         | 0.164                                          | 0.120 | 0.078 | 0.041 | 0.093                                            | 0.090 | 0.080 |

|                   |    |       |       |       |       |       |       |       |
|-------------------|----|-------|-------|-------|-------|-------|-------|-------|
| dCTP              | R3 | 0.163 | 0.116 | 0.073 | 0.057 | 0.102 | 0.088 | 0.065 |
|                   | R1 | 0.233 | 0.152 | 0.100 | 0.057 | 0.206 | 0.189 | 0.146 |
|                   | R2 | 0.258 | 0.159 | 0.082 | 0.040 | 0.167 | 0.168 | 0.143 |
| dTTP              | R3 | 0.224 | 0.157 | 0.087 | 0.057 | 0.189 | 0.158 | 0.108 |
|                   | R1 | 0.264 | 0.220 | 0.168 | 0.090 | 0.241 | 0.228 | 0.222 |
|                   | R2 | 0.306 | 0.224 | 0.150 | 0.072 | 0.202 | 0.199 | 0.216 |
| NAD <sup>+</sup>  | R3 | 0.297 | 0.222 | 0.143 | 0.106 | 0.228 | 0.195 | 0.178 |
|                   | R1 | 0.676 | 0.896 | 0.814 | 0.746 | 0.572 | 0.577 | 0.554 |
|                   | R2 | 0.675 | 0.837 | 0.841 | 0.628 | 0.542 | 0.531 | 0.562 |
| NADP <sup>+</sup> | R3 | 0.760 | 0.868 | 0.787 | 0.677 | 0.583 | 0.543 | 0.598 |
|                   | R1 | 0.272 | 0.359 | 0.309 | 0.331 | 0.241 | 0.216 | 0.196 |
|                   | R2 | 0.292 | 0.328 | 0.310 | 0.264 | 0.213 | 0.222 | 0.210 |
| UDP-GlcNAc        | R3 | 0.308 | 0.355 | 0.310 | 0.338 | 0.223 | 0.199 | 0.185 |
|                   | R1 | 0.313 | 0.215 | 0.154 | 0.121 | 0.364 | 0.394 | 0.372 |
|                   | R2 | 0.353 | 0.204 | 0.135 | 0.117 | 0.326 | 0.390 | 0.354 |
| IMP               | R3 | 0.432 | 0.187 | 0.140 | 0.108 | 0.343 | 0.404 | 0.389 |
|                   | R1 | 0.010 | 0.008 | 0.007 | 0.004 | 0.024 | 0.024 | 0.017 |
|                   | R2 | 0.011 | 0.010 | 0.007 | n.d.  | 0.031 | 0.016 | 0.014 |
| dGTP/pApp         | R3 | 0.011 | 0.015 | 0.008 | n.d.  | 0.028 | 0.015 | 0.007 |
|                   | R1 | 0.129 | 0.156 | 0.130 | 0.108 | 0.169 | 0.096 | 0.089 |
|                   | R2 | 0.140 | 0.159 | 0.119 | 0.084 | 0.105 | 0.088 | 0.119 |
|                   | R3 | 0.105 | 0.203 | 0.137 | 0.132 | 0.124 | 0.086 | 0.108 |

1 \*NADH and NADPH were not detected due to instability during extraction procedure and  
2 storage conditions for extracts.  
3  
4

1 **Supplementary Table 4. Genotypes of *P. aeruginosa* and *E. coli* strains used in this**  
 2 **study.**  
 3

| Organism                     | Genotype                                   | Description                                                                                    | Reference  |
|------------------------------|--------------------------------------------|------------------------------------------------------------------------------------------------|------------|
| <i>P. aeruginosa</i><br>PAO1 | wild-type                                  |                                                                                                | 2          |
|                              | ΔPA4856                                    | <i>retS</i> deletion strain                                                                    | This study |
|                              | ΔPA4856 attB:: <i>lacZ</i>                 | <i>retS</i> deletion strain, constitutive <i>lacZ</i> expression strain, Tet <sup>R</sup>      | This study |
|                              | ΔPA4856 ΔPA0093                            | <i>retS tse6</i> deletion strain                                                               | This study |
| <i>P. aeruginosa</i><br>PA14 | wild-type                                  |                                                                                                | 3          |
|                              | ΔPA14_                                     |                                                                                                |            |
|                              | ΔPA14_52570                                | <i>rsmA</i> deletion strain                                                                    | This study |
|                              | ΔPA14_52570 ΔPA14_68450                    | <i>rsmA rsmF</i> deletion strain                                                               | This study |
|                              | ΔPA14_52570 ΔPA14_68450 attB:: <i>lacZ</i> | <i>rsmA rsmF</i> deletion strain, constitutive <i>lacZ</i> expression strain, Tet <sup>R</sup> | This study |
|                              | ΔPA14_52570 ΔPA14_68450                    | <i>rsmA rsmF clpVI</i> deletion strain                                                         | This study |
|                              | ΔPA14_01100                                |                                                                                                |            |
|                              | ΔPA14_52570 ΔPA14_68450                    | <i>rsmA rsmF tas1</i> deletion strain                                                          | This study |
|                              | ΔPA14_01140                                |                                                                                                |            |
|                              | ΔPA14_52570 ΔPA14_68450                    | <i>rsmA rsmF tsi6</i> deletion strain                                                          | This study |
|                              | ΔPA14_01120                                |                                                                                                |            |
|                              | ΔPA14_52570 ΔPA14_68450                    | <i>rsmA rsmF tas1 tis1</i> deletion strain                                                     | This study |
|                              | ΔPA14_01140 ΔPA14_01130                    |                                                                                                |            |
|                              | attB:: <i>lacZ</i>                         |                                                                                                |            |
|                              | ΔPA14_52570 ΔPA14_68450                    | <i>rsmA rsmF tas1 tis1</i> deletion strain                                                     | This study |
|                              | ΔPA14_01140 ΔPA14_01130                    | <i>tsi6</i> deletion strain                                                                    |            |
|                              | ΔPA14_01120 attB:: <i>lacZ</i>             |                                                                                                |            |
|                              | ΔPA14_52570 ΔPA14_68450                    | <i>rsmA rsmF eagT6</i> deletion strain                                                         | This study |
|                              | ΔPA14_01150                                |                                                                                                |            |
| ΔPA14_52570 ΔPA14_68450      | <i>rsmA rsmF vgrG1</i> deletion strain     | This study                                                                                     |            |
| ΔPA14_01110                  |                                            |                                                                                                |            |
| ΔPA14_52570 ΔPA14_68450      | <i>rsmA rsmF vgrG2</i> deletion strain     | This study                                                                                     |            |
| ΔPA14_01160                  |                                            |                                                                                                |            |
| ΔPA14_52570 ΔPA14_68450      | <i>rsmA rsmF vgrG4</i> deletion strain     | This study                                                                                     |            |
| ΔPA14_29390                  |                                            |                                                                                                |            |
| ΔPA14_64230                  | <i>retS</i> deletion strain                | This study                                                                                     |            |

|                                     |                                                                                                                                                      |                                                                              |                      |
|-------------------------------------|------------------------------------------------------------------------------------------------------------------------------------------------------|------------------------------------------------------------------------------|----------------------|
|                                     | $\Delta$ PA14_64230 $\Delta$ PA14_57520                                                                                                              | <i>retS sspB</i> deletion strain                                             | This study           |
|                                     | $\Delta$ PA14_64230 $\Delta$ PA14_57520 PA14_01130-DAS+4                                                                                             | <i>retS sspB</i> deletion strain expressing Tis1 with a C-terminal DAS+4 tag | This study           |
|                                     | $\Delta$ PA14_52570 $\Delta$ PA14_68450 PA14_01140-VSV-G                                                                                             | <i>rsmA rsmF</i> deletion strain expressing Tas1 with a C-terminal VSV-G tag | This study           |
|                                     | $\Delta$ PA14_52570 $\Delta$ PA14_68450 PA14_01140-E382A                                                                                             | <i>rsmA rsmF</i> deletion strain expressing Tas1 <sup>E382A</sup>            | This study           |
| <i>E. coli</i>                      | wild-type                                                                                                                                            |                                                                              | 4                    |
| MG1655                              |                                                                                                                                                      |                                                                              |                      |
| <i>E. coli</i> SM10 $\lambda$ pir   | Km <sup>R</sup> , <i>thi-1 thr leu tonA lac Y supE recA::RP4-2-Tc::Mu</i> , pir                                                                      | Conjugation strain                                                           | BioMedal LifeScience |
| <i>E. coli</i> XL-1 Blue            | <i>recA1 endA1 gyrA96 thi-1 hsdR17 supE44 relA1 lac [F' proAB lacI<sup>q</sup> Z<math>\Delta</math>M15 Tn10 (Tet<sup>R</sup>)]</i>                   | Cloning strain                                                               | Agilent              |
| <i>E. coli</i> BL21 (DE3) CodonPlus | F <sup>-</sup> <i>ompT gal dcm lon hsdS<sub>B</sub>(r<sub>B</sub><sup>-</sup> m<sub>B</sub><sup>-</sup>)</i> $\lambda$ (DE3) pLysS(Cm <sup>R</sup> ) | Protein expression strain                                                    | Novagen              |

1  
2

1 **Supplementary Table 5. Plasmids used for allelic exchange, protein expression and**  
 2 **toxicity assays.**  
 3

| Plasmid                  | Relevant features                                                                                                        | Reference  |
|--------------------------|--------------------------------------------------------------------------------------------------------------------------|------------|
| pEXG2                    | Allelic replacement vector containing <i>sacB</i> , Gm <sup>R</sup>                                                      | 5          |
| pPSV38-CV                | Expression vector with <i>lacI</i> , <i>lacUV5</i> promoter, C-terminal VSV-G tag, Gm <sup>R</sup>                       | 6          |
| pPSV39-CV                | Expression vector with <i>lacI</i> , <i>lacUV5</i> promoter, C-terminal VSV-G tag, Gm <sup>R</sup>                       | 7          |
| pSCrhaB2-CV              | Expression vector with <i>PrhaB</i> , Tmp <sup>R</sup>                                                                   | 8          |
| pETDuet-1                | Co-expression vector with <i>lacI</i> , T7 promoter, N-terminal His <sub>6</sub> tag in MCS-1, Amp <sup>R</sup>          | Novagen    |
| pET28b                   | Expression vector with <i>lacI</i> , T7 promoter, C-terminal His <sub>6</sub> tag, Amp <sup>R</sup>                      | Novagen    |
| pCfa                     | Expression vector with <i>lacI</i> , T7 promoter, C-terminal Cfa-His <sub>6</sub> intein tag, Amp <sup>R</sup>           | 9          |
| pKSV45-Amp <sup>R</sup>  | Expression vector with <i>tetR</i> and <i>ptet</i> promoter, replaced <i>kan<sup>R</sup></i> with <i>amp<sup>R</sup></i> | 10         |
| pALS13                   | Expression vector for (p)ppGpp synthetase fragment of RelA 1-455 (RelA')                                                 | 11         |
| pSW196                   | MiniCTX1 plasmid, Tet <sup>R</sup>                                                                                       | 12         |
| pEXG2::ΔPA0905           | <i>rsmA</i> deletion construct for PAO1                                                                                  | This study |
| pEXG2::ΔPA5182           | <i>rsmF</i> deletion construct for PAO1                                                                                  | This study |
| pEXG2::ΔPA0093           | <i>tse6</i> deletion construct                                                                                           | This study |
| pEXG2::ΔPA0090           | <i>clpVI</i> deletion construct for PAO1                                                                                 | This study |
| pEXG2::ΔPA14_52570       | <i>rsmA</i> deletion construct for PA14                                                                                  | This study |
| pEXG2::ΔPA14_68450       | <i>rsmF</i> deletion construct for PA14                                                                                  | This study |
| pEXG2::ΔPA14_01100       | <i>clpVI</i> deletion construct for PA14                                                                                 | This study |
| pEXG2::ΔPA14_01140       | <i>tasI</i> deletion construct                                                                                           | This study |
| pEXG2::ΔPA14_01120       | <i>tsi6</i> deletion construct                                                                                           | This study |
| pEXG2::ΔPA14_01140-01130 | <i>tasI tsi1</i> deletion construct                                                                                      | This study |
| pEXG2::ΔPA14_01140-01120 | <i>tasI tsi1 tsi6</i> deletion construct                                                                                 | This study |
| pEXG2::ΔPA14_01150       | <i>eagT6</i> deletion construct                                                                                          | This study |
| pEXG2::ΔPA14_01110       | <i>vgrG1</i> deletion construct                                                                                          | This study |
| pEXG2::ΔPA14_01160       | <i>vgrG2</i> deletion construct                                                                                          | This study |
| pEXG2::ΔPA14_29390       | <i>vgrG4</i> deletion construct                                                                                          | This study |

|                                                                   |                                                                                                             |            |
|-------------------------------------------------------------------|-------------------------------------------------------------------------------------------------------------|------------|
| pEXG2::ΔPA14_64230                                                | <i>retS</i> deletion construct                                                                              | This study |
| pEXG2::ΔPA14_57520                                                | <i>sspB</i> deletion construct                                                                              | This study |
| pEXG2::PA14_01130_DAS+4                                           | For generating strains encoding Tis1 fused to a C-terminal DAS+4 tag (AANDENYSENYADAS)                      | This study |
| pEXG2::PA14_01140-VSV-G                                           | For generating strains encoding Tas1 fused to a C-terminal VSV-G epitope tag (YTDIEMNRLGK)                  | This study |
| pEXG2::PA14_01140_E382A                                           | For generating strains encoding Tas1 <sup>E382A</sup>                                                       | This study |
| pPSV39-CV::PA14_01130                                             | Expression vector for <i>tas1</i>                                                                           | This study |
| pPSV39-CV::PA14_01120                                             | Expression vector for <i>tsi6</i>                                                                           | This study |
| pPSV39-CV::PA14_57520                                             | Expression vector for <i>sspB</i>                                                                           | This study |
| pPSV39-CV::PA5338                                                 | Expression vector for <i>spoT</i>                                                                           | This study |
| pScRhaB2-CV::PA14_01140_251-CT                                    | Expression vector for the C-terminal toxin domain of Tas1 (Tas1 <sub>tox</sub> )                            | This study |
| pScRhaB2-CV::PA14_01140_251-CT_K305A                              | Expression vector for Tas1 <sub>tox</sub> <sup>K305A</sup>                                                  | This study |
| pScRhaB2-CV::PA14_01140_251-CT_K313A                              | Expression vector for Tas1 <sub>tox</sub> <sup>K313A</sup>                                                  | This study |
| pScRhaB2-CV::PA14_01140_251-CT_K326A                              | Expression vector for Tas1 <sub>tox</sub> <sup>K326A</sup>                                                  | This study |
| pScRhaB2-CV::PA14_01140_251-CT_D327A                              | Expression vector for Tas1 <sub>tox</sub> <sup>D327A</sup>                                                  | This study |
| pScRhaB2-CV::PA14_01140_251-CT_R330A                              | Expression vector for Tas1 <sub>tox</sub> <sup>R330A</sup>                                                  | This study |
| pScRhaB2-CV::PA14_01140_251-CT_E382A                              | Expression vector for Tas1 <sub>tox</sub> <sup>E382A</sup>                                                  | This study |
| pScRhaB2-CV::PA14_01140_251-CT_E382D                              | Expression vector for Tas1 <sub>tox</sub> <sup>E382D</sup>                                                  | This study |
| A1-2                                                              | Expression vector for Tas1 <sub>tox</sub> with N-terminal His <sub>6</sub> and C-terminal VSV-G epitope     | This study |
| pETDuet-1::His <sub>6</sub> _PA14_01140_251-CT :: PA14_01130      | Co-expression vector for Tas1 <sub>tox</sub> with N-terminal His <sub>6</sub> and Tis1                      | This study |
| pETDuet-1::His <sub>6</sub> _PA14_01140_251-CT_VSV-G:: PA14_01130 | Co-expression vector for Tas1 <sub>tox</sub> with N-terminal His <sub>6</sub> and C-terminal VSV-G and Tis1 | This study |
| pETDuet-1::PA5338_1-387_His <sub>6</sub>                          | Expression vector for the SpoT <sub>1-387</sub> fragment with C-terminal His <sub>6</sub>                   | This study |
| pET28b:: D8B36_07150                                              | Expression vector for PurF <sup>EC</sup>                                                                    | 9          |
| pET28b:: D8B36_21350                                              | Expression vector for PurD <sup>EC</sup>                                                                    | 9          |
| pCfa:: D8B36_07150                                                | Expression vector for PurF <sup>EC</sup>                                                                    | 9          |
| pCfa:: D8B36_07150_R62A                                           | Expression vector for PurF <sup>EC</sup> R62A                                                               | 9          |



pCfa:: PA14\_23290  
pSW196:: *lacZ*

Expression vector for PurF<sup>PA</sup>  
*lacZ* in miniCTX1 plasmid

This study  
13

1  
2

1 **Supplementary Figure 1. Source gels.** Uncropped blots for Extended Data figures.  
2

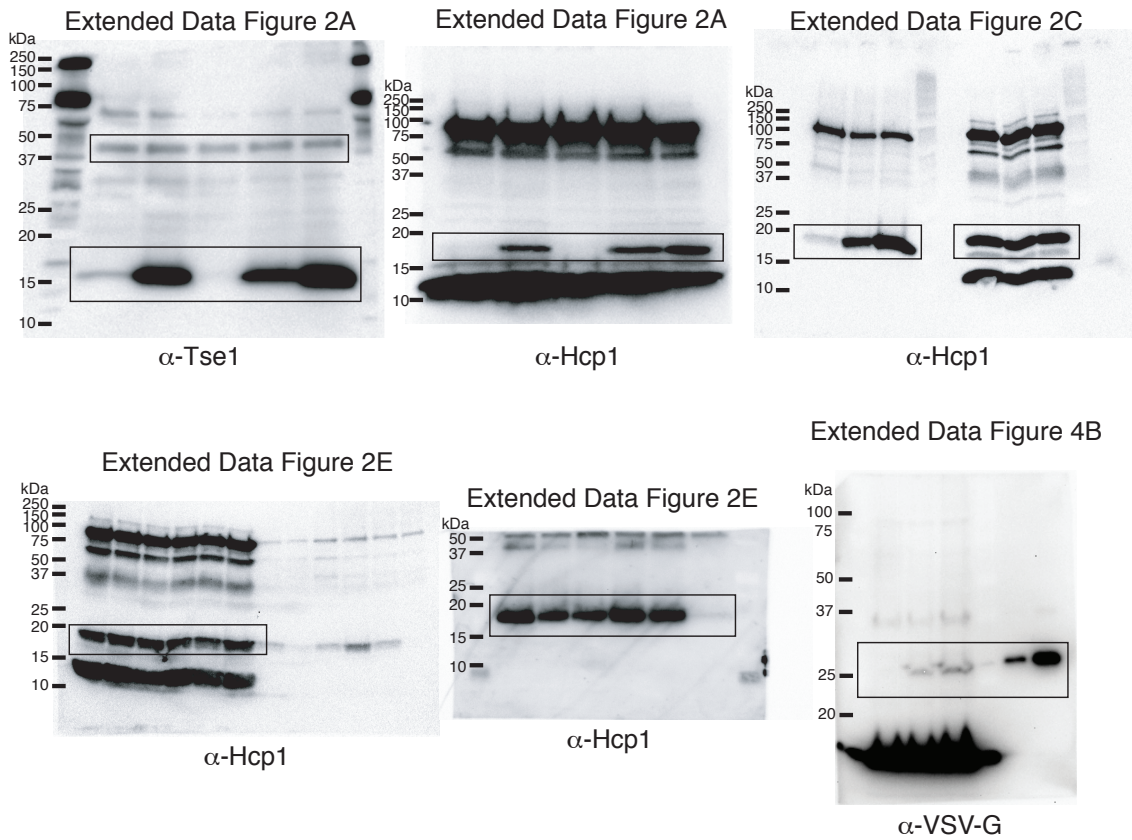

3

## Supplemental References

- 1 Haas, T. M. *et al.* Magic spot nucleotides: tunable target-specific chemoenzymatic synthesis. *Chem Commun (Camb)* **55**, 5339-5342, doi:10.1039/c9cc01688k (2019).
- 2 Stover, C. K. *et al.* Complete genome sequence of *Pseudomonas aeruginosa* PAO1, an opportunistic pathogen. *Nature* **406**, 959-964, doi:10.1038/35023079 (2000).
- 3 Lee, D. G. *et al.* Genomic analysis reveals that *Pseudomonas aeruginosa* virulence is combinatorial. *Genome biology* **7**, R90, doi:10.1186/gb-2006-7-10-r90 (2006).
- 4 Edwards, J. S. & Palsson, B. O. The *Escherichia coli* MG1655 in silico metabolic genotype: its definition, characteristics, and capabilities. *Proceedings of the National Academy of Sciences of the United States of America* **97**, 5528-5533, doi:10.1073/pnas.97.10.5528 (2000).
- 5 Rietsch, A., Vallet-Gely, I., Dove, S. L. & Mekalanos, J. J. ExsE, a secreted regulator of type III secretion genes in *Pseudomonas aeruginosa*. *Proceedings of the National Academy of Sciences of the United States of America* **102**, 8006-8011, doi:10.1073/pnas.0503005102 (2005).
- 6 Castang, S., McManus, H. R., Turner, K. H. & Dove, S. L. H-NS family members function coordinately in an opportunistic pathogen. *Proceedings of the National Academy of Sciences of the United States of America* **105**, 18947-18952, doi:10.1073/pnas.0808215105 (2008).
- 7 Silverman, J. M. *et al.* Haemolysin coregulated protein is an exported receptor and chaperone of type VI secretion substrates. *Molecular cell* **51**, 584-593, doi:10.1016/j.molcel.2013.07.025 (2013).
- 8 Cardona, S. T. & Valvano, M. A. An expression vector containing a rhamnose-inducible promoter provides tightly regulated gene expression in *Burkholderia cenocepacia*. *Plasmid* **54**, 219-228, doi:10.1016/j.plasmid.2005.03.004 (2005).
- 9 Wang, B. *et al.* Affinity-based capture and identification of protein effectors of the growth regulator ppGpp. *Nature chemical biology* **15**, 141-150, doi:10.1038/s41589-018-0183-4 (2019).
- 10 McKenna, R. & Nielsen, D. R. Styrene biosynthesis from glucose by engineered *E. coli*. *Metab Eng* **13**, 544-554, doi:10.1016/j.ymben.2011.06.005 (2011).
- 11 Schreiber, G. *et al.* Overexpression of the *relA* gene in *Escherichia coli*. *The Journal of biological chemistry* **266**, 3760-3767 (1991).
- 12 Baynham, P. J., Ramsey, D. M., Gvozdyev, B. V., Cordonnier, E. M. & Wozniak, D. J. The *Pseudomonas aeruginosa* ribbon-helix-helix DNA-binding protein AlgZ (AmrZ) controls twitching motility and biogenesis of type IV pili. *Journal of bacteriology* **188**, 132-140, doi:10.1128/JB.188.1.132-140.2006 (2006).
- 13 Whitney, J. C. *et al.* Genetically distinct pathways guide effector export through the type VI secretion system. *Molecular microbiology* **92**, 529-542, doi:10.1111/mmi.12571 (2014).
